# Supplementary material for: New Insights into the Loss of Antioxidant Effectiveness of Phenolic Compounds in Vegetable Oils in the Presence of Phosphatidylcholine
Source: MDPI journal article supplement (doi:10.3390/antiox12111993), 2023-11-11
Supplement: s1 [file s1]

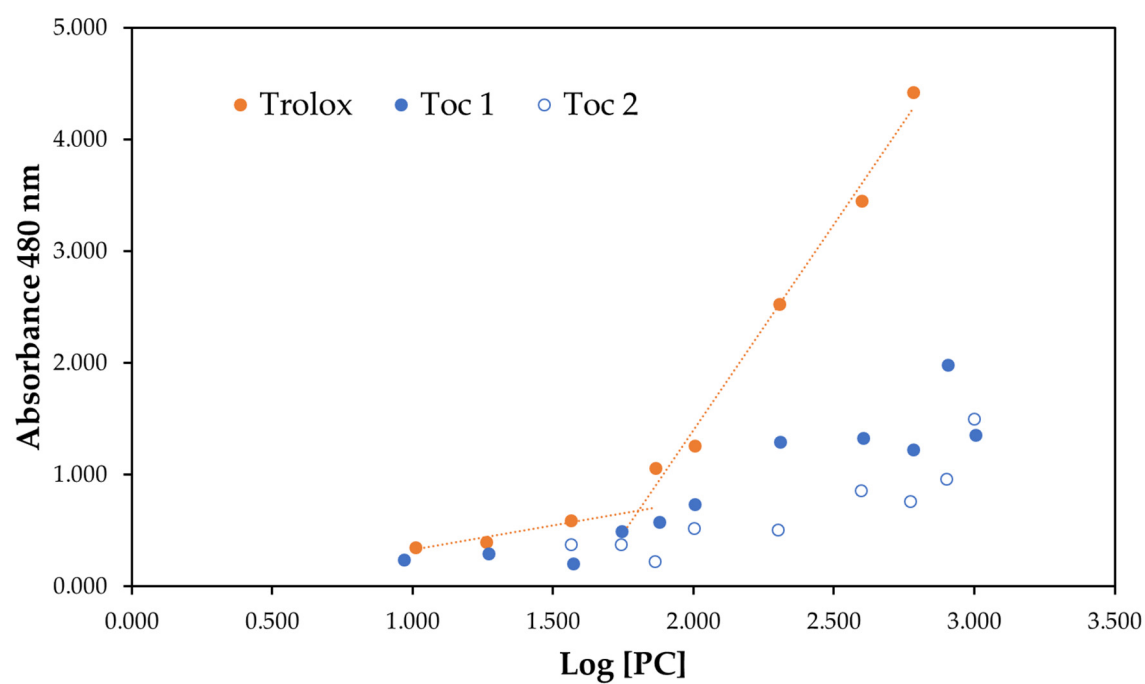

**Figure S1.** Determination of the critical micelle concentration (CMC) of phosphatidylcholine (PC) in stripped sunflower oil (SSO) in the presence of 1.16 mmol kg<sup>-1</sup>  $\alpha$ -tocopherol (Toc) or Trolox at 100°C. Toc 1 and Toc 2 refer to duplicate experiments made in different days.
